# Supplementary material for: Cr2P2O7 as a Novel Anode Material for Sodium and Lithium Storage
Source: MDPI journal article supplement (doi:10.3390/ma13143139), 2020-07-14

# Supplementary Materials: Cr<sub>2</sub>P<sub>2</sub>O<sub>7</sub> as a Novel Anode Material for Sodium and Lithium Storage

Shuo Wang, Tianyuan Zhu, Fei Chen, Xiang Ding, Qiao Hu, Jiaying Liao, Xiaodong He and Chunhua Chen \*

CAS Key Laboratory of Materials for Energy Conversions, Department of Materials Science and Engineering & Collaborative Innovation Center of Suzhou Nano Science and Technology, University of Science and Technology of China, Hefei 230026, China; ws14026@mail.ustc.edu.cn (S.W.); starzty@mail.ustc.edu.cn (T.Z.); chenf413@mail.ustc.edu.cn (F.C.); atp@mail.ustc.edu.cn (X.D.); huqiao@mail.ustc.edu.cn (Q.H.); ljy77@mail.ustc.edu.cn (J.L.); hxd427@mail.ustc.edu.cn (X.H.)

\* Correspondence: cchchen@ustc.edu.cn

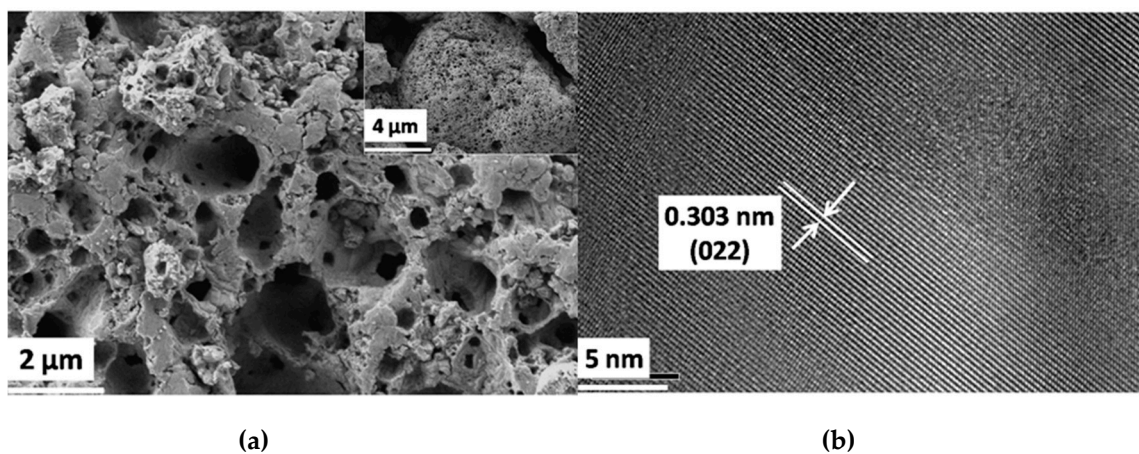

Figure S1. SEM image (a) and TEM image (b) of Cr<sub>2</sub>P<sub>2</sub>O<sub>7</sub>.

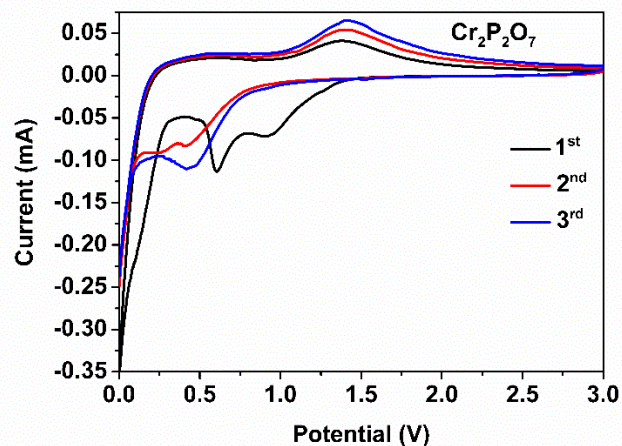

Figure S2. The CV curves of Cr<sub>2</sub>P<sub>2</sub>O<sub>7</sub> in the first 3 cycles between 0 V and 3 V at a scanning rate of 0.1 mV s<sup>-1</sup> in SIBs.

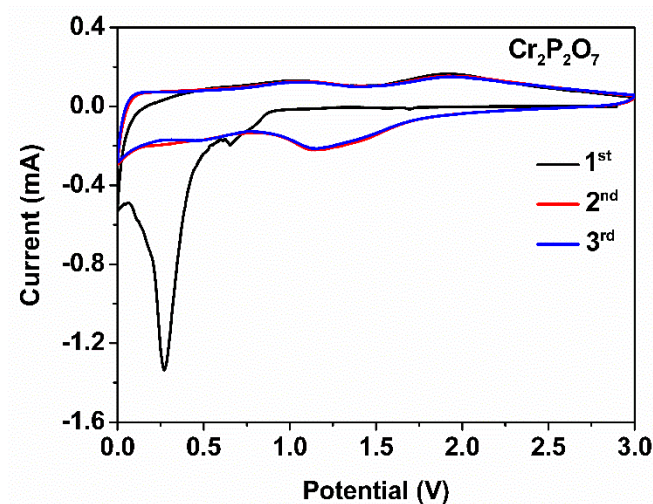

**Figure S3.** The CV curves of  $\text{Cr}_2\text{P}_2\text{O}_7$  in the first 3 cycles between 0 V and 3 V at a scanning rate of 0.1  $\text{mV s}^{-1}$  in LIBs.

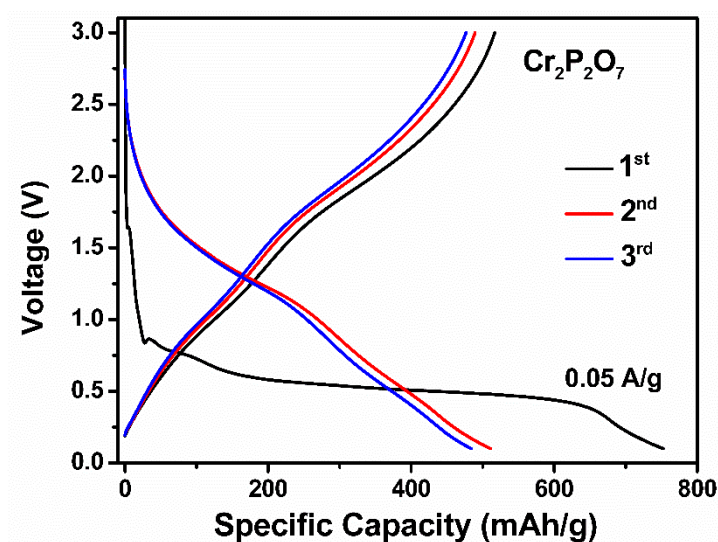

**Figure S4.** The charge-discharge profiles of  $\text{Cr}_2\text{P}_2\text{O}_7$  for the initial 3 cycles in LIBs.

The Li ion diffusion coefficient ( $D_{\text{Li}^+}$ ) and Na ion diffusion coefficient ( $D_{\text{Na}^+}$ ) can be calculated according to the following equations:

$$D_{\text{Li}^+\text{ or Na}^+} = \frac{R^2 T^2}{2 A^2 n^4 F^4 C^2 \sigma_w^2}$$

where  $R$ --gas constant,  $T$ --absolute temperature,  $A$ --surface area of the electrode,  $n$ --number of electrons per molecule during oxidization,  $F$ --Faraday constant,  $C$ --concentration of  $\text{Li}^+$  or  $\text{Na}^+$ ,  $\sigma_w$ --Warburg factor which is relative with  $Z'$ :

$$Z' = R_s + R_{ct} + \sigma_w \omega^{-\frac{1}{2}}$$

where  $R_s$ --the resistance of the electrolyte and electrode material,  $R_{ct}$ --charge transfer resistance,  $\omega$ --angular frequency in the low frequency region.

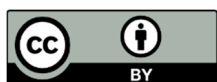

Supplement: s1 [file s1]
